# Supplementary material for: Longitudinal Secretion of Paramyxovirus RNA in the Urine of Straw-Coloured Fruit Bats (Eidolon helvum)
Source: Preprints.org preprint supplement (doi:10.20944/preprints202107.0467.v1), 2021-07-20
Supplement: Supplementary file 1 [file supplementary]

## Sheet: Captive urine 2019
Sample number (Z19-xxx)	Week	Extra sampling	Date (dd-mm-yy)	Breeding season	Rain season	Temperature (°C)	Humidity (%)	Rain (Y/N)	Fecal contamination at collection (0/1/2)	Tarpaulin sheet #	Urine (plain frozen)	Urine (RNAlater)	Laboratory colour scale Colourless/Yellow	Laboratory scale for contamination 0-2	Number of positive pools that day	PAR PCR	REF	Seq L	(%Id)	RMH PCR	REF	Seq L	(%Id)
1	8	0	2019-02-21	0	0	28.7	79	N	0	1	1	1	C	1	3	0				0
2	8	0	2019-02-21	0	0	28.7	79	N	0	1	1	1	C	0	3	0				1	HQ660134.1	Bat Paramyxovirus Eid_hel/GH-M90a/GHA/2009 isolate BatPV/Eid_hel/GH-M90a/GHA/2009 RNA-dependent RNA polymerase (L) gene, partial cds	0.9882
3	8	0	2019-02-21	0	0	28.7	79	N	0	3 and 2	1	1	C	1	3	1	JN648061.1	Eidolon helvum paramyxovirus clone U46B large protein (L) gene, partial cds	0.8584	0
4	8	0	2019-02-21	0	0	28.7	79	N	0	2	1	1	Y	1	3	0				0
5	8	0	2019-02-21	0	0	28.7	79	N	0	3	0	1	C	0	3	1	JN648061.1	Eidolon helvum paramyxovirus clone U46B large protein (L) gene, partial cds	0.9886	0
6	8	1	2019-02-22	0	0	27.1	99	N	2	1	1	1	Y	0	4	1	JN648061.1	Eidolon helvum paramyxovirus clone U46B large protein (L) gene, partial cds	0.9886	1	HQ660134.1	Bat Paramyxovirus Eid_hel/GH-M90a/GHA/2009 isolate BatPV/Eid_hel/GH-M90a/GHA/2009 RNA-dependent RNA polymerase (L) gene, partial cds	0.9882
7	8	1	2019-02-22	0	0	27.1	99	N	1	1	1	1	Y	1	4	0				1	HQ660134.1	Bat Paramyxovirus Eid_hel/GH-M90a/GHA/2009 isolate BatPV/Eid_hel/GH-M90a/GHA/2009 RNA-dependent RNA polymerase (L) gene, partial cds	0.9882
8	8	1	2019-02-22	0	0	27.1	99	N	1	2	1	1	Y	1	4	0				0
9	8	1	2019-02-22	0	0	27.1	99	N	1	2	0	1	Y	1	4	1	JN648061.1	Eidolon helvum paramyxovirus clone U46B large protein (L) gene, partial cds 884 884 69% 0.0 98.85% gi|373427798|JN648061.1	0.9885	1	JN862571.1	Eidolon helvum paramyxovirus clone U54B polymerase (L) gene, partial cds	0.9646
10	8	1	2019-02-22	0	0	27.1	99	N	2	3	1	1	Y	1	4	1	KF878080.1	Mumps virus strain MuVi/RW154.USA/0.70s[K] nucleocapsid-associated protein, phosphoprotein, virion protein (V), matrix protein (M), fusion protein (F), small hydrophobic protein (SH), hemagglutinin-neuraminidase (HN), and large protein (L) genes, complete cds	0.7885	1	FJ971935.1	Paramyxovirus bat/GH15/2009 polymerase (L) gene, partial cds	0.9581
11	9	0	2019-02-25	0	0	26.1	79	N	0	2	1	1	C	1	0	0				0
12	9	0	2019-02-25	0	0	26.1	79	N	0	1	1	1	C	0	0	0				0
13	9	0	2019-02-25	0	0	26.1	79	N	0	1	1	1	C	0	0	0				0
14	9	0	2019-02-25	0	0	26.1	79	N	0	3	1	1	Y	1	0	0				0
15	9	0	2019-02-25	0	0	26.1	79	N	2	1, 2 and 3	1	1	Y	1	0	0				0
16	10	0	2019-03-07	1	0	25.5	99	N	0	1	1	1	C	0	2	0				0
17	10	0	2019-03-07	1	0	25.5	99	N	1	1	1	1	C	0	2	0				0
18	10	0	2019-03-07	1	0	25.5	99	N	0	1	1	1	C	0	2	0				0
19	10	0	2019-03-07	1	0	25.5	99	N	1	1	1	1	C	0	2	0				0
20	10	0	2019-03-07	1	0	25.5	99	N	1	2	1	1	C	0	2	0				0
21	10	0	2019-03-07	1	0	25.5	99	N	1	2	1	1	C	0	2	0				0
22	10	0	2019-03-07	1	0	25.5	99	N	1	2	1	1	Y	1	2	0				0
23	10	0	2019-03-07	1	0	25.5	99	N	1	2	1	1	C	0	2	0				0
24	10	0	2019-03-07	1	0	25.5	99	N	1	3 and 1	1	1	C	0	2	0				1	JN862571.1	Eidolon helvum paramyxovirus clone U54B polymerase (L) gene, partial cds	0.9716
25	10	0	2019-03-07	1	0	25.5	99	N	1	3	1	1	C	0	2	0				1	JN862571.1	Eidolon helvum paramyxovirus clone U54B polymerase (L) gene, partial cds	0.9672
26	11	0	2019-03-13	1	0	28.8	92	N	1	1	1	1	C	0	1	0				0
27	11	0	2019-03-13	1	0	28.8	92	N	0	2	1	1	C	2	1	0				0
28	11	0	2019-03-13	1	0	28.8	92	N	0	3	1	1	C	0	1	0				0
29	11	0	2019-03-13	1	0	28.8	92	N	0	2	1	1	C	0	1	0				0
30	11	0	2019-03-13	1	0	28.8	92	N	0	1	1	1	C	0	1	0				1	FJ971935.1	Paramyxovirus bat/GH15/2009 polymerase (L) gene, partial cds	0.9771
31	12	0	2019-03-21	1	0	25.8	82	N	0	1	1	1	C	0	3	0				0
32	12	0	2019-03-21	1	0	25.8	82	N	1	1	1	1	Y	0	3	1	JN648061.1	Eidolon helvum paramyxovirus clone U46B large protein (L) gene, partial cds	0.9663	0
33	12	0	2019-03-21	1	0	25.8	82	N	0	1	1	1	C	0	3	0				1	FJ971935.1	Paramyxovirus bat/GH15/2009 polymerase (L) gene, partial cds	0.9794
34	12	0	2019-03-21	1	0	25.8	82	N	0	2	1	1	C	0	3	0				0
35	12	0	2019-03-21	1	0	25.8	82	N	1	3	1	1	Y	0	3	0				1	FJ971935.1	Paramyxovirus bat/GH15/2009 polymerase (L) gene, partial cds	0.9716
36	13	0	2019-03-28	1	0	28.7	80	N	0	1	1	1	C	0	0	0				0
37	13	0	2019-03-28	1	0	28.7	80	N	0	1	1	1	C	0	0	0				0
38	13	0	2019-03-28	1	0	28.7	80	N	0	2	1	1	C	0	0	0				0
39	13	0	2019-03-28	1	0	28.7	80	N	0	2	1	1	Y	2	0	0				0
40	13	0	2019-03-28	1	0	28.7	80	N	0	3	1	1	C	0	0	0				0
41	14	0	2019-04-04	1	0	30	75	N	1	1	1	1	Y	1	2	0				0
42	14	0	2019-04-04	1	0	30	75	N	1	1 and 3	1	1	C	0	2	0				0
43	14	0	2019-04-04	1	0	30	75	N	1	1 and 2	1	1	Y	2	2	0				0
44	14	0	2019-04-04	1	0	30	75	N	1	1	1	1	C	0	2	1	JX051320.1	Achimota virus 2, complete genome	0.978	0
45	14	0	2019-04-04	1	0	30	75	N	1	1 and 3	1	1	C	0	2	1	KF878080.1	Mumps virus strain MuVi/RW154.USA/0.70s[K] nucleocapsid-associated protein, phosphoprotein, virion protein (V), matrix protein (M), fusion protein (F), small hydrophobic protein (SH), hemagglutinin-neuraminidase (HN), and large protein (L) genes, complete cds	0.7974	0
46	15	0	2019-04-11	1	0	25.5	87	N	0	1	1	1	C	0	0	0				0
47	15	0	2019-04-11	1	0	25.5	87	N	0	1	1	1	C	0	0	0				0
48	15	0	2019-04-11	1	0	25.5	87	N	0	2	1	1	C	0	0	0				0
49	15	0	2019-04-11	1	0	25.5	87	N	0	2	1	1	C	0	0	0				0
50	15	0	2019-04-11	1	0	25.5	87	N	0	3	1	1	C	0	0	0				0
51	16	0	2019-04-17	1	0	27.8	82	N	0	1	1	1	C	0	0	0				0
52	16	0	2019-04-17	1	0	27.8	82	N	0	1	1	1	C	0	0	0				0
53	16	0	2019-04-17	1	0	27.8	82	N	0	2	1	1	C	0	0	0				0
54	16	0	2019-04-17	1	0	27.8	82	N	0	2	1	1	C	0	0	0				0
55	16	0	2019-04-17	1	0	27.8	82	N	0	3	1	1	C	0	0	0				0
56	17	0	2019-04-25	1	0	27.7	79	N	0	1	1	1	Y	0	2	0				0
57	17	0	2019-04-25	1	0	27.7	79	N	0	1	1	1	C	0	2	0				1	FJ971935.1	Paramyxovirus bat/GH15/2009 polymerase (L) gene, partial cds	0.9771
58	17	0	2019-04-25	1	0	27.7	79	N	0	2	1	1	C	0	2	0				1	JN862571.1	Eidolon helvum paramyxovirus clone U54B polymerase (L) gene, partial cds	0.9716
59	17	0	2019-04-25	1	0	27.7	79	N	0	2	1	1	C	0	2	0				0
60	17	0	2019-04-25	1	0	27.7	79	N	2	3	1	1	Y	0	2	0				0
61	18	0	2019-05-02	1	1	27.8	80	N	2	1	1	1	Y	0	0	0				0
62	18	0	2019-05-02	1	1	27.8	80	N	2	1	1	1	Y	0	0	0				0
63	18	0	2019-05-02	1	1	27.8	80	N	2	2	1	1	Y	0	0	0				0
64	18	0	2019-05-02	1	1	27.8	80	N	2	2	1	1	Y	1	0	0				0
65	18	0	2019-05-02	1	1	27.8	80	N	2	3 and 1	1	1	Y	1	0	0				0
66	19	0	2019-05-10	1	1	24.6	80	N	0	1	1	1	C	0	0	0				0
67	19	0	2019-05-10	1	1	24.6	80	N	0	1	1	1	C	0	0	0				0
68	19	0	2019-05-10	1	1	24.6	80	N	0	1	1	1	C	0	0	0				0
69	19	0	2019-05-10	1	1	24.6	80	N	0	2	1	1	C	0	0	0				0
70	19	0	2019-05-10	1	1	24.6	80	N	0	3	1	1	C	0	0	0				0
71	20	0	2019-05-16	1	1	26.1	82	N	1	1	1	1	Y	0	0	0				0
72	20	0	2019-05-16	1	1	26.1	82	N	1	1	1	1	C	0	0	0				0
73	20	0	2019-05-16	1	1	26.1	82	N	1	2	1	1	Y	0	0	0				0
74	20	0	2019-05-16	1	1	26.1	82	N	1	2	1	1	C	0	0	0				0
75	20	0	2019-05-16	1	1	26.1	82	N	1	3	1	1	Y	0	0	0				0
76	21	0	2019-05-23	1	1	26.8	79	N	1	1	1	1	C	0	0	0				0
77	21	0	2019-05-23	1	1	26.8	79	N	1	1	1	1	C	0	0	0				0
78	21	0	2019-05-23	1	1	26.8	79	N	1	2	1	1	Y	0	0	0				0
79	21	0	2019-05-23	1	1	26.8	79	N	1	2	1	1	Y	0	0	0				0
80	21	0	2019-05-23	1	1	26.8	79	N	1	3	1	1	C	0	0	0				0
81	22	1	2019-05-29	1	1	22.9	99	N	2	1	1	1	C	1	0	0				0
82	22	1	2019-05-29	1	1	22.9	99	N	2	1	1	1	C	1	0	0				0
83	22	1	2019-05-29	1	1	22.9	99	N	0	2	1	1	Y	0	0	0				0
84	22	1	2019-05-29	1	1	22.9	99	N	2	3	1	1	C	0	0	0				0
85	22	1	2019-05-29	1	1	22.9	99	N	0	2	1	1	C	1	0	0				0
86	22	0	2019-05-30	1	1	27.2	79	N	0	2	1	1	Y	1	1	0				0
87	22	0	2019-05-30	1	1	27.2	79	N	0	1	1	1	C	0	1	1	KF878080.1	Mumps virus strain MuVi/RW154.USA/0.70s[K] nucleocapsid-associated protein, phosphoprotein, virion protein (V), matrix protein (M), fusion protein (F), small hydrophobic protein (SH), hemagglutinin-neuraminidase (HN), and large protein (L) genes, complete cds	0.7974	0
88	22	0	2019-05-30	1	1	27.2	79	N	2	3	1	1	C	0	1	0				0
89	22	0	2019-05-30	1	1	27.2	79	N	0	2	1	1	Y	1	1	0				0
90	22	0	2019-05-30	1	1	27.2	79	N	2	1	1	1	C	0	1	0				0
91	22	1	2019-05-31	1	1	24.7	93	N	2	1	1	1	Y	2	0	0				0
92	22	1	2019-05-31	1	1	24.7	93	N	1	1	1	1	C	0	0	0				0
93	22	1	2019-05-31	1	1	24.7	93	N	0	2	1	1	Y	1	0	0				0
94	22	1	2019-05-31	1	1	24.7	93	N	1	2	1	1	C	0	0	0				0
95	22	1	2019-05-31	1	1	24.7	93	N	1	3	1	1	Y	0	0	0				0
96	22	1	2019-06-01	1	1	25.1	79	N	1	1	1	1	C	0	3	0				1	FJ971935.1	Paramyxovirus bat/GH15/2009 polymerase (L) gene, partial cds	0.9814
97	22	1	2019-06-01	1	1	25.1	79	N	1	1	1	1	C	0	3	0				1	FJ971935.1	Paramyxovirus bat/GH15/2009 polymerase (L) gene, partial cds	0.9813
98	22	1	2019-06-01	1	1	25.1	79	N	0	2	1	1	Y	1	3	0				0
99	22	1	2019-06-01	1	1	25.1	79	N	0	1 and 2	1	1	Y	0	3	0				2	JN862571.1, FJ971935.1	Eidolon helvum paramyxovirus clone U54B polymerase (L) gene, partial cds, Paramyxovirus bat/GH15/2009 polymerase (L) gene, partial cds	82.74%, 86.04%
100	22	1	2019-06-01	1	1	25.1	79	N	1	3	1	1	Y	0	3	0				0
101	23	1	2019-06-03	1	1	26.1	79	N	1	1	1	1	C	0	2	0				1	FJ971935.1	Paramyxovirus bat/GH15/2009 polymerase (L) gene, partial cds	0.972
102	23	1	2019-06-03	1	1	26.1	79	N	1	1	1	1	C	0	2	0				1	FJ971935.1	Paramyxovirus bat/GH15/2009 polymerase (L) gene, partial cds	0.9362
103	23	1	2019-06-03	1	1	26.1	79	N	0	2	1	1	Y	1	2	0				0
104	23	1	2019-06-03	1	1	26.1	79	N	0	2	1	1	C	0	2	0				0
105	23	1	2019-06-03	1	1	26.1	79	N	1	3	1	1	C	0	2	0				0
106	23	0	2019-06-06	1	1	25.8	85	N	0	1	1	1	C	0	0	0				0
107	23	0	2019-06-06	1	1	25.8	85	N	0	1	1	1	C	0	0	0				0
108	23	0	2019-06-06	1	1	25.8	85	N	0	2	1	1	C	0	0	0				0
109	23	0	2019-06-06	1	1	25.8	85	N	0	2	1	1	C	0	0	0				0
110	23	0	2019-06-06	1	1	25.8	85	N	0	3	1	1	C	0	0	0				0
111	24	0	2019-06-13	1	1	25.2	82	N	0	1	1	1	C	0	0	0				0
112	24	0	2019-06-13	1	1	25.2	82	N	0	1	1	1	C	0	0	0				0
113	24	0	2019-06-13	1	1	25.2	82	N	0	2	1	1	C	1	0	0				0
114	24	0	2019-06-13	1	1	25.2	82	N	0	2	1	1	C	0	0	0				0
115	24	0	2019-06-13	1	1	25.2	82	N	0	1 and 3	1	1	C	0	0	0				0
116	25	0	2019-06-20	1	1	28.2	78	N	1	1	1	1	C	1	3	0				0
117	25	0	2019-06-20	1	1	28.2	78	N	2	2	1	1	Y	0	3	1	AB853096.1	Bat Paramyxovirus Eid_hel/ZFB09-32/Zambia/2009 L gene for RNA polymerase, partial cds	0.9769	1	HQ660134.1	Bat Paramyxovirus Eid_hel/GH-M90a/GHA/2009 isolate BatPV/Eid_hel/GH-M90a/GHA/2009 RNA-dependent RNA polymerase (L) gene, partial cds	0.9815
118	25	0	2019-06-20	1	1	28.2	78	N	2	2	1	1	Y	2	3	0				1	HQ660134.1	Bat Paramyxovirus Eid_hel/GH-M90a/GHA/2009 isolate BatPV/Eid_hel/GH-M90a/GHA/2009 RNA-dependent RNA polymerase (L) gene, partial cds	0.9817
119	25	0	2019-06-20	1	1	28.2	78	N	2	3	1	1	Y	0	3	0				0
120	25	0	2019-06-20	1	1	28.2	78	N	1	1	1	1	C	1	3	0				1	JN862571.1	Eidolon helvum paramyxovirus clone U54B polymerase (L) gene, partial cds	0.9718
121	26	0	2019-06-27	1	1	23.8	89	N	2	2	1	1	Y	1	4	0				0
122	26	0	2019-06-27	1	1	23.8	89	N	2	2	1	1	Y	1	4	0				1	FJ971935.1	Paramyxovirus bat/GH15/2009 polymerase (L) gene, partial cds	0.8831
123	26	0	2019-06-27	1	1	23.8	89	N	2	1	1	1	Y	1	4	1	KF878080.1	Mumps virus strain MuVi/RW154.USA/0.70s[K] nucleocapsid-associated protein, phosphoprotein, virion protein (V), matrix protein (M), fusion protein (F), small hydrophobic protein (SH), hemagglutinin-neuraminidase (HN), and large protein (L) genes, complete cds	0.793	1	FJ971935.1	Paramyxovirus bat/GH15/2009 polymerase (L) gene, partial cds	0.9504
124	26	0	2019-06-27	1	1	23.8	89	N	2	1	1	1	Y	1	4	0				1	FJ971935.1	Paramyxovirus bat/GH15/2009 polymerase (L) gene, partial cds	0.9837
125	26	0	2019-06-27	1	1	23.8	89	N	2	1 and 3	1	1	Y	2	4	0				1	FJ971935.1	Paramyxovirus bat/GH15/2009 polymerase (L) gene, partial cds	0.9837
126	27	0	2019-07-04	1	0	25	90	N	2	1	1	1	Y	0	1	0				0
127	27	0	2019-07-04	1	0	25	90	N	2	1	1	1	Y	1	1	0				0
128	27	0	2019-07-04	1	0	25	90	N	0	2	1	1	C	0	1	0				0
129	27	0	2019-07-04	1	0	25	90	N	2	2	1	1	Y	1	1	0				1	FJ971935.1	Paramyxovirus bat/GH15/2009 polymerase (L) gene, partial cds	0.9769
130	27	0	2019-07-04	1	0	25	90	N	2	3	1	1	Y	1	1	0				0
142	29	0	2019-07-18	1	0	24.5	88	N	2	1	1	1	C	1	1	0				0
143	29	0	2019-07-18	1	0	24.5	88	N	2	1	1	1	C	1	1	0				0
144	29	0	2019-07-18	1	0	24.5	88	N	2	2	1	1	C	2	1	0				0
145	29	0	2019-07-18	1	0	24.5	88	N	0	2	1	1	C	1	1	0				0
146	29	0	2019-07-18	1	0	24.5	88	N	2	3	1	1	Y	2	1	0				1	HQ660147.1	Bat Paramyxovirus Eid_hel/GH-M28/GHA/2009 isolate BatPV/Eid_hel/GH-M28/GHA/2009 RNA-dependent RNA polymerase (L) gene, partial cds	0.984
147	30	0	2019-07-25	1	0	24.3	90	N	0	1	1	1	C	0	2	0				1	HQ660147.1	Bat Paramyxovirus Eid_hel/GH-M28/GHA/2009 isolate BatPV/Eid_hel/GH-M28/GHA/2009 RNA-dependent RNA polymerase (L) gene, partial cds	0.993
148	30	0	2019-07-25	1	0	24.3	90	N	0	1	1	1	C	0	2	0				1	HQ660147.1	Bat Paramyxovirus Eid_hel/GH-M28/GHA/2009 isolate BatPV/Eid_hel/GH-M28/GHA/2009 RNA-dependent RNA polymerase (L) gene, partial cds	0.9953
149	30	0	2019-07-25	1	0	24.3	90	N	0	2	1	1	C	1	2	0				0
150	30	0	2019-07-25	1	0	24.3	90	N	0	2	1	1	C	0	2	0				0
151	30	0	2019-07-25	1	0	24.3	90	N	0	3	1	1	C	0	2	0				0
152	31	0	2019-08-01	1	0	24.2	92	N	2	2	1	1	C	0	3	0				0
153	31	0	2019-08-01	1	0	24.2	92	N	0	2	1	1	C	0	3	0				1	FJ971935.1	Paramyxovirus bat/GH15/2009 polymerase (L) gene, partial cds	0.9793
154	31	0	2019-08-01	1	0	24.2	92	N	1	1	1	1	Y	0	3	1	AB853096.1	Bat Paramyxovirus Eid_hel/ZFB09-32/Zambia/2009 L gene for RNA polymerase, partial cds	0.9804	1	HQ660134.1	Bat Paramyxovirus Eid_hel/GH-M90a/GHA/2009 isolate BatPV/Eid_hel/GH-M90a/GHA/2009 RNA-dependent RNA polymerase (L) gene, partial cds	0.9835
155	31	0	2019-08-01	1	0	24.2	92	N	1	1	1	1	Y	0	3	1	AB853096.1	Bat Paramyxovirus Eid_hel/ZFB09-32/Zambia/2009 L gene for RNA polymerase, partial cds	0.9822	1	HQ660134.1	Bat Paramyxovirus Eid_hel/GH-M90a/GHA/2009 isolate BatPV/Eid_hel/GH-M90a/GHA/2009 RNA-dependent RNA polymerase (L) gene, partial cds	0.9382
156	31	0	2019-08-01	1	0	24.2	92	N	0	3	1	1	Y	1	3	0				0
157	32	0	2019-08-08	1	0	23.8	84	N	1	1	1	1	Y	1	1	0				0
158	32	0	2019-08-08	1	0	23.8	84	N	1	1	1	1	Y	1	1	0				0
159	32	0	2019-08-08	1	0	23.8	84	N	1	2	1	1	C	1	1	0				0
160	32	0	2019-08-08	1	0	23.8	84	N	1	2	1	1	C	1	1	1	KF878080.1	Mumps virus strain MuVi/RW154.USA/0.70s[K] nucleocapsid-associated protein, phosphoprotein, virion protein (V), matrix protein (M), fusion protein (F), small hydrophobic protein (SH), hemagglutinin-neuraminidase (HN), and large protein (L) genes, complete cds	0.7974	0
161	32	0	2019-08-08	1	0	23.8	84	N	1	1 and 3	1	1	C	1	1	0				0
162	33	0	2019-08-15	1	0	24.3	90	N	1	1	1	1	C	0	4	1	JN648082.1	Eidolon helvum paramyxovirus clone U68G large protein (L) gene, partial cds	0.9612	1	JN862573.1	Eidolon helvum paramyxovirus clone U51B polymerase (L) gene, partial cds	0.9882
163	33	0	2019-08-15	1	0	24.3	90	N	1	1	1	1	C	0	4	1	JN648082.1	Eidolon helvum paramyxovirus clone U68G large protein (L) gene, partial cds	0.9594	0
164	33	0	2019-08-15	1	0	24.3	90	N	1	2	1	1	C	0	4	1	KF878080.1	Mumps virus strain MuVi/RW154.USA/0.70s[K] nucleocapsid-associated protein, phosphoprotein, virion protein (V), matrix protein (M), fusion protein (F), small hydrophobic protein (SH), hemagglutinin-neuraminidase (HN), and large protein (L) genes, complete cds	0.7974	0
165	33	0	2019-08-15	1	0	24.3	90	N	1	2	1	1	C	0	4	1	KF878080.1	Mumps virus strain MuVi/RW154.USA/0.70s[K] nucleocapsid-associated protein, phosphoprotein, virion protein (V), matrix protein (M), fusion protein (F), small hydrophobic protein (SH), hemagglutinin-neuraminidase (HN), and large protein (L) genes, complete cds	0.7974	0
166	33	0	2019-08-15	1	0	24.3	90	N	1	3	1	1	Y	0	4	0				0
167	34	0	2019-08-22	1	0	24	90	N	0	1	1	1	C	0	2	0				0
168	34	0	2019-08-22	1	0	24	90	N	0	1	1	1	C	0	2	1	KF878080.1	Mumps virus strain MuVi/RW154.USA/0.70s[K] nucleocapsid-associated protein, phosphoprotein, virion protein (V), matrix protein (M), fusion protein (F), small hydrophobic protein (SH), hemagglutinin-neuraminidase (HN), and large protein (L) genes, complete cds	0.7974	0
169	34	0	2019-08-22	1	0	24	90	N	0	2	1	1	C	0	2	0				0
170	34	0	2019-08-22	1	0	24	90	N	0	2	1	1	C	0	2	0				0
171	34	0	2019-08-22	1	0	24	90	N	0	3	1	1	C	0	2	0				1	HQ660134.1	Bat Paramyxovirus Eid_hel/GH-M90a/GHA/2009 isolate BatPV/Eid_hel/GH-M90a/GHA/2009 RNA-dependent RNA polymerase (L) gene, partial cds	0.9858
172	35	1	2019-08-27	1	0	24.2	90	N	0	1	1	1	C	0	1	0				0
173	35	1	2019-08-27	1	0	24.2	90	N	1	1	1	1	C	0	1	0				0
174	35	1	2019-08-27	1	0	24.2	90	N	1	2	1	1	C	0	1	0				0
175	35	1	2019-08-27	1	0	24.2	90	N	0	2	1	1	C	0	1	1	KF878080.1	Mumps virus strain MuVi/RW154.USA/0.70s[K] nucleocapsid-associated protein, phosphoprotein, virion protein (V), matrix protein (M), fusion protein (F), small hydrophobic protein (SH), hemagglutinin-neuraminidase (HN), and large protein (L) genes, complete cds	0.7974	0
176	35	1	2019-08-27	1	0	24.2	90	N	0	3	1	1	C	0	1	0				0
177	35	1	2019-08-28	1	0	24.2	89	N	0	1	1	1	C	0	0	0				0
178	35	1	2019-08-28	1	0	24.2	89	N	0	1	1	1	C	0	0	0				0
179	35	1	2019-08-28	1	0	24.2	89	N	0	2	1	1	C	0	0	0				0
180	35	1	2019-08-28	1	0	24.2	89	N	0	2	1	1	C	0	0	0				0
181	35	1	2019-08-28	1	0	24.2	89	N	0	3	1	1	C	0	0	0				0
182	35	0	2019-08-29	1	0	24.5	82	N	0	1	1	1	Y	0	0	0				0
183	35	0	2019-08-29	1	0	24.5	82	N	0	1	1	1	Y	0	0	0				0
184	35	0	2019-08-29	1	0	24.5	82	N	0	2	1	1	C	0	0	0				0
185	35	0	2019-08-29	1	0	24.5	82	N	0	2	1	1	C	0	0	0				0
186	35	0	2019-08-29	1	0	24.5	82	N	0	3	1	1	Y	0	0	0				0
187	35	1	2019-08-30	1	0	24.3	91	N	1	1	1	1	C	0	1	0				0
188	35	1	2019-08-30	1	0	24.3	91	N	0	1	1	1	C	0	1	0				1	HQ660147.1	Bat Paramyxovirus Eid_hel/GH-M28/GHA/2009 isolate BatPV/Eid_hel/GH-M28/GHA/2009 RNA-dependent RNA polymerase (L) gene, partial cds	0.9976
189	35	1	2019-08-30	1	0	24.3	91	N	0	2	1	1	C	0	1	0				0
190	35	1	2019-08-30	1	0	24.3	91	N	1	2	1	1	C	0	1	0				0
191	35	1	2019-08-30	1	0	24.3	91	N	1	3	1	1	C	1	1	0				0
192	36	1	2019-09-02	1	0	24.9	89	N	2	1	1	1	Y	0	1	1	KF878080.1	Mumps virus strain MuVi/RW154.USA/0.70s[K] nucleocapsid-associated protein, phosphoprotein, virion protein (V), matrix protein (M), fusion protein (F), small hydrophobic protein (SH), hemagglutinin-neuraminidase (HN), and large protein (L) genes, complete cds	0.7974	0
193	36	1	2019-09-02	1	0	24.9	89	N	2	1	1	1	Y	0	1	0				0
194	36	1	2019-09-02	1	0	24.9	89	N	2	2	1	1	C	0	1	0				0
195	36	1	2019-09-02	1	0	24.9	89	N	2	2	1	1	C	0	1	0				0
196	36	1	2019-09-02	1	0	24.9	89	N	2	3	1	1	Y	0	1	0				0
197	36	0	2019-09-05	1	0	24.9	89	N	2	1	1	1	Y	0	4	1	KF878080.1	Mumps virus strain MuVi/RW154.USA/0.70s[K] nucleocapsid-associated protein, phosphoprotein, virion protein (V), matrix protein (M), fusion protein (F), small hydrophobic protein (SH), hemagglutinin-neuraminidase (HN), and large protein (L) genes, complete cds	0.7123	1	HQ660147.1	Bat Paramyxovirus Eid_hel/GH-M28/GHA/2009 isolate BatPV/Eid_hel/GH-M28/GHA/2009 RNA-dependent RNA polymerase (L) gene, partial cds	0.9907
198	36	0	2019-09-05	1	0	24.9	89	N	2	2 and 3	1	1	Y	0	4	1	GU128081.1	Tuhoko virus 2, complete genome	0.7327	0
199	36	0	2019-09-05	1	0	24.9	89	N	2	2	1	1	Y	0	4	0				0
200	36	0	2019-09-05	1	0	24.9	89	N	2	2	1	1	Y	0	4	1	KF878080.1	Mumps virus strain MuVi/RW154.USA/0.70s[K] nucleocapsid-associated protein, phosphoprotein, virion protein (V), matrix protein (M), fusion protein (F), small hydrophobic protein (SH), hemagglutinin-neuraminidase (HN), and large protein (L) genes, complete cds	0.7885	0
201	36	0	2019-09-05	1	0	24.9	89	N	2	3	1	1	Y	0	4	1	JX051320.1	Achimota virus 2, complete genome	0.9832	0
202	37	0	2019-09-12	1	0	24.2	92	N	2	1	1	1	Y	0	2	1	GU128081.1	Tuhoko virus 2, complete genome	0.7305	0
203	37	0	2019-09-12	1	0	24.2	92	N	2	1 and 2	1	1	Y	0	2	0				0
204	37	0	2019-09-12	1	0	24.2	92	N	2	2	1	1	Y	0	2	0				0
205	37	0	2019-09-12	1	0	24.2	92	N	2	2	1	1	Y	0	2	0				0
206	37	0	2019-09-12	1	0	24.2	92	N	2	3	1	1	Y	0	2	0				1	HQ660147.1	Bat Paramyxovirus Eid_hel/GH-M28/GHA/2009 isolate BatPV/Eid_hel/GH-M28/GHA/2009 RNA-dependent RNA polymerase (L) gene, partial cds	0.9907
207	38	0	2019-09-19	1	0	25.5	81	N	2	1	1	1	C	0	1	0				0
208	38	0	2019-09-19	1	0	25.5	81	N	2	1	1	1	C	0	1	1	KF878080.1	Mumps virus strain MuVi/RW154.USA/0.70s[K] nucleocapsid-associated protein, phosphoprotein, virion protein (V), matrix protein (M), fusion protein (F), small hydrophobic protein (SH), hemagglutinin-neuraminidase (HN), and large protein (L) genes, complete cds	0.7974	1	JN862573.1	Eidolon helvum paramyxovirus clone U51B polymerase (L) gene, partial cds	0.993
209	38	0	2019-09-19	1	0	25.5	81	N	2	2	1	1	Y	0	1	0				0
210	38	0	2019-09-19	1	0	25.5	81	N	2	2	1	1	Y	0	1	0				0
211	38	0	2019-09-19	1	0	25.5	81	N	2	3	1	1	Y	0	1	0				0
212	39	0	2019-09-26	1	0	25.6	87	N	2	1	1	1	Y	0	1	0				0
213	39	0	2019-09-26	1	0	25.6	87	N	2	1	1	1	Y	0	1	0				1	FJ971935.1	Paramyxovirus bat/GH15/2009 polymerase (L) gene, partial cds	0.9794
214	39	0	2019-09-26	1	0	25.6	87	N	2	2	1	1	Y	0	1	0				0
215	39	0	2019-09-26	1	0	25.6	87	N	2	2	1	1	Y	0	1	0				0
216	39	0	2019-09-26	1	0	25.6	87	N	2	3	1	1	Y	0	1	0				0
217	40	0	2019-10-04	0	0	25.4	92		2	1	1	1	C	0	0	0				0
218	40	0	2019-10-04	0	0	25.4	92		2	1	1	1	C	0	0	0				0
219	40	0	2019-10-04	0	0	25.4	92		2	2	1	1	C	0	0	0				0
220	40	0	2019-10-04	0	0	25.4	92		2	2	1	1	C	0	0	0				0
221	40	0	2019-10-04	0	0	25.4	92		2	3	1	1	C	0	0	0				0
222	41	0	2019-10-10	0	0	25.8	91		2	1	1	1	Y	0	1	0				0
223	41	0	2019-10-10	0	0	25.8	91		2	1 and 2	1	1	Y	0	1	0				0
224	41	0	2019-10-10	0	0	25.8	91		2	2	1	1	Y	0	1	0				1	FJ971935.1	Paramyxovirus bat/GH15/2009 polymerase (L) gene, partial cds	0.9857
225	41	0	2019-10-10	0	0	25.8	91		2	2	1	1	Y	0	1	0				0
226	41	0	2019-10-10	0	0	25.8	91		2	3	1	1	Y	0	1	0				0
227	42	0	2019-10-17	0	0	25.9	92	Y	0	1	1	1	C	0	0	0				0
228	42	0	2019-10-17	0	0	25.9	92	Y	0	1	1	1	C	0	0	0				0
229	42	0	2019-10-17	0	0	25.9	92	Y	0	2	1	1	C	0	0	0				0
230	42	0	2019-10-17	0	0	25.9	92	Y	0	2	1	1	C	0	0	0				0
231	42	0	2019-10-17	0	0	25.9	92	Y	0	3	1	1	C	0	0	0				0
232	43	0	2019-10-24	0	0	25.4	89	N	0	1	1	1	C	0	0	0				0
233	43	0	2019-10-24	0	0	25.4	89	N	0	2	1	1	C	0	0	0				0
234	43	0	2019-10-24	0	0	25.4	89	N	0	2	1	1	C	0	0	0				0
235	43	0	2019-10-24	0	0	25.4	89	N	0	3	1	1	C	0	0	0				0
236	43	0	2019-10-24	0	0	25.4	89	N	0	3	1	1	C	0	0	0				0
237	44	0	2019-10-31	0	0	24.6	91	N	0	1	1	1	C	0	0	0				0
238	44	0	2019-10-31	0	0	24.6	91	N	0	1	1	1	C	0	0	0				0
239	44	0	2019-10-31	0	0	24.6	91	N	0	2	1	1	C	0	0	0				0
240	44	0	2019-10-31	0	0	24.6	91	N	0	2	1	1	C	1	0	0				0
241	44	0	2019-10-31	0	0	24.6	91	N	0	3	1	1	C	0	0	0				0
242	45	0	2019-11-07	0	0	25.9	89	N	0	1	1	1	C	0	1	1	KF878080.1	Mumps virus strain MuVi/RW154.USA/0.70s[K] nucleocapsid-associated protein, phosphoprotein, virion protein (V), matrix protein (M), fusion protein (F), small hydrophobic protein (SH), hemagglutinin-neuraminidase (HN), and large protein (L) genes, complete cds	0.793	0
243	45	0	2019-11-07	0	0	25.9	89	N	0	1	1	1	C	0	1	0				0
244	45	0	2019-11-07	0	0	25.9	89	N	0	2	1	1	C	0	1	0				0
245	45	0	2019-11-07	0	0	25.9	89	N	0	2	1	1	C	0	1	0				0
246	45	0	2019-11-07	0	0	25.9	89	N	0	3	1	1	C	0	1	0				0
247	46	0	2019-11-14	0	0	24.2	99	N	0	3	1	1	C	0	2	0				1	JN862573.1	Eidolon helvum paramyxovirus clone U51B polymerase (L) gene, partial cds	0.993
248	46	0	2019-11-14	0	0	24.2	99	N	0	3	1	1	C	0	2	0				0
249	46	0	2019-11-14	0	0	24.2	99	N	0	2	1	1	C	0	2	0				0
250	46	0	2019-11-14	0	0	24.2	99	N	0	2	1	1	C	0	2	0				1	HQ660147.1	Bat Paramyxovirus Eid_hel/GH-M28/GHA/2009 isolate BatPV/Eid_hel/GH-M28/GHA/2009 RNA-dependent RNA polymerase (L) gene, partial cds	0.9378
251	46	0	2019-11-14	0	0	24.2	99	N	0	1	1	1	C	0	2	0				0
252	47	1	2019-11-18	0	0	26.7	91	N	0	1	1	1	C	0	0	0				0
253	47	1	2019-11-18	0	0	26.7	91	N	0	1	1	1	C	0	0	0				0
254	47	1	2019-11-18	0	0	26.7	91	N	0	2	1	1	C	0	0	0				0
255	47	1	2019-11-18	0	0	26.7	91	N	0	2	1	1	C	0	0	0				0
256	47	1	2019-11-18	0	0	26.7	91	N	0	3	1	1	C	0	0	0				0
257	47	1	2019-11-19	0	0	25.2	91	N	0	1	1	1	C	0	1	0				0
258	47	1	2019-11-19	0	0	25.2	91	N	0	1	1	1	C	0	1	0				0
259	47	1	2019-11-19	0	0	25.2	91	N	0	2	1	1	C	0	1	0				0
260	47	1	2019-11-19	0	0	25.2	91	N	0	2	1	1	C	0	1	0				0
261	47	1	2019-11-19	0	0	25.2	91	N	0	3	1	1	C	0	1	0				1	JN862573.1	Eidolon helvum paramyxovirus clone U51B polymerase (L) gene, partial cds	0.9907
262	47	0	2019-11-20	0	0	27.2	90	N	0	1	1	1	C	0	1	0				0
263	47	0	2019-11-20	0	0	27.2	90	N	0	1 and 2	1	1	C	0	1	0				0
264	47	0	2019-11-20	0	0	27.2	90	N	0	2	1	1	C	0	1	0				0
265	47	0	2019-11-20	0	0	27.2	90	N	0	2	1	1	C	0	1	0				1	FJ971935.1	Paramyxovirus bat/GH15/2009 polymerase (L) gene, partial cds	0.9857
266	47	0	2019-11-20	0	0	27.2	90	N	0	3	1	1	C	0	1	0				0
267	48	0	2019-11-28	0	0	26.8	90	N	0	1	1	1	C	0	1	0				0
268	48	0	2019-11-28	0	0	26.8	90	N	0	1	1	1	C	0	1	0				0
269	48	0	2019-11-28	0	0	26.8	90	N	0	2	1	1	C	0	1	0				0
270	48	0	2019-11-28	0	0	26.8	90	N	0	2	1	1	C	0	1	0				0
271	48	0	2019-11-28	0	0	26.8	90	N	0	3	1	1	C	0	1	0				1	JN862573.1	Eidolon helvum paramyxovirus clone U51B polymerase (L) gene, partial cds	0.9953
272	48	1	2019-11-29	0	0	26.8	90	N	0	1	1	1	C	0	2	0				0
273	48	1	2019-11-29	0	0	26.8	90	N	0	1	1	1	C	0	2	0				1	HQ660147.1	Bat Paramyxovirus Eid_hel/GH-M28/GHA/2009 isolate BatPV/Eid_hel/GH-M28/GHA/2009 RNA-dependent RNA polymerase (L) gene, partial cds	0.8962
274	48	1	2019-11-29	0	0	26.8	90	N	0	2	1	1	C	0	2	0				1	JN862571.1	Eidolon helvum paramyxovirus clone U54B polymerase (L) gene, partial cds	0.9631
275	48	1	2019-11-29	0	0	26.8	90	N	0	2	1	1	C	0	2	0				0
276	48	1	2019-11-29	0	0	26.8	90	N	0	3	1	1	C	0	2	0				0
277	49	0	2019-12-05	0	0	26.4	93	N	0	1	1	1	C	0	0	0				0
278	49	0	2019-12-05	0	0	26.4	93	N	0	1	1	1	C	0	0	0				0
279	49	0	2019-12-05	0	0	26.4	93	N	0	2	1	1	C	0	0	0				0
280	49	0	2019-12-05	0	0	26.4	93	N	0	2	1	1	C	0	0	0				0
281	49	0	2019-12-05	0	0	26.4	93	N	0	3	1	1	C	0	0	0				0
282	50	0	2019-12-12	0	0	26.5	78	N	0	1	1	1	C	0	0	0				0
283	50	0	2019-12-12	0	0	26.5	78	N	0	1	1	1	C	0	0	0				0
284	50	0	2019-12-12	0	0	26.5	78	N	0	2	1	1	C	0	0	0				0
285	50	0	2019-12-12	0	0	26.5	78	N	0	2	1	1	C	0	0	0				0
286	50	0	2019-12-12	0	0	26.5	78	N	0	3	1	1	C	0	0	0				0
287	51	0	2019-12-19	0	0	27.2	87	N	0	1	1	1	C	0	0	0				0
288	51	0	2019-12-19	0	0	27.2	87	N	0	1	1	1	C	0	0	0				0
289	51	0	2019-12-19	0	0	27.2	87	N	0	2	1	1	C	0	0	0				0
290	51	0	2019-12-19	0	0	27.2	87	N	0	2	1	1	C	0	0	0				0
291	51	0	2019-12-19	0	0	27.2	87	N	0	3	1	1	C	0	0	0				0
292	52	0	2019-12-26	0	0	26.2	87	N	1	1	1	1	C	0	3	1	JN648056.1	Eidolon helvum paramyxovirus clone U42A large protein (L) gene, partial cds	0.7515	0
293	52	0	2019-12-26	0	0	26.2	87	N	1	1 and 2	1	1	C	0	3	0				0
294	52	0	2019-12-26	0	0	26.2	87	N	2	2	1	1	Y	0	3	0				0
295	52	0	2019-12-26	0	0	26.2	87	N	1	2	1	1	Y	0	3	0				1	JN862571.1	Eidolon helvum paramyxovirus clone U54B polymerase (L) gene, partial cds	0.9715
296	52	0	2019-12-26	0	0	26.2	87	N	2	3	1	1	C	0	3	1	JN648056.1	Eidolon helvum paramyxovirus clone U42A large protein (L) gene, partial cds	0.7451	0
297	1	0	2020-01-02	0	0	22.4	65	N	1	1	1	1	C	0	0	0				0
298	1	0	2020-01-02	0	0	22.4	65	N	1	1	1	1	C	0	0	0				0
299	1	0	2020-01-02	0	0	22.4	65	N	1	2	1	1	C	0	0	0				0
300	1	0	2020-01-02	0	0	22.4	65	N	1	2	1	1	C	0	0	0				0
301	1	0	2020-01-02	0	0	22.4	65	N	1	3	1	1	C	0	0	0				0
302	2	0	2020-01-09	0	0	26.4	76	N	1	1	1	1	C	0	1	0				0
303	2	0	2020-01-09	0	0	26.4	76	N	1	1	1	1	C	0	1	0				1	FJ971935.1	Paramyxovirus bat/GH15/2009 polymerase (L) gene, partial cds	0.9794
304	2	0	2020-01-09	0	0	26.4	76	N	1	2	1	1	Y	0	1	0				0
305	2	0	2020-01-09	0	0	26.4	76	N	1	2	1	1	Y	0	1	0				0
306	2	0	2020-01-09	0	0	26.4	76	N	1	3	1	1	C	0	1	0				0
307	3	0	2020-01-16	0	0	27.9	84	N	2	1	1	1	Y	0	2	0				1	FJ971935.1	Paramyxovirus bat/GH15/2009 polymerase (L) gene, partial cds	0.9816
308	3	0	2020-01-16	0	0	27.9	84	N	2	1	1	1	Y	0	2	0				0
309	3	0	2020-01-16	0	0	27.9	84	N	2	2	1	1	Y	1	2	0				0
310	3	0	2020-01-16	0	0	27.9	84	N	2	2	1	1	Y	0	2	0				1	FJ971935.1	Paramyxovirus bat/GH15/2009 polymerase (L) gene, partial cds	0.8765
311	3	0	2020-01-16	0	0	27.9	84	N	2	3	1	1	Y	0	2	0				0
312	4	0	2020-01-23	0	0	28.4	85	N	2	1	1	1	Y	1	0	0				0
313	4	0	2020-01-23	0	0	28.4	85	N	2	1	1	1	Y	0	0	0				0
314	4	0	2020-01-23	0	0	28.4	85	N	2	2	1	1	Y	1	0	0				0
315	4	0	2020-01-23	0	0	28.4	85	N	2	2	1	1	Y	2	0	0				0
316	4	0	2020-01-23	0	0	28.4	85	N	2	3	1	1	Y	0	0	0				0
317	5	0	2020-01-30	0	0	27.8	87	N	2	1	1	1	Y	0	4	1	HE647836.1	Eidolon paramyxovirus RC09 partial L gene for RNA dependent RNA polymerase, isolate EPMV_RC09_PP236u2	0.9636	1	FJ971939.1	Paramyxovirus bat/GH21a/2009 polymerase (L) gene, partial cds	0.9929
318	5	0	2020-01-30	0	0	27.8	87	N	2	1	1	1	Y	0	4	1	HE647836.1	Eidolon paramyxovirus RC09 partial L gene for RNA dependent RNA polymerase, isolate EPMV_RC09_PP236u2	0.9636	0
319	5	0	2020-01-30	0	0	27.8	87	N	2	2	1	1	Y	0	4	1	KF878080.1	Mumps virus strain MuVi/RW154.USA/0.70s[K] nucleocapsid-associated protein, phosphoprotein, virion protein (V), matrix protein (M), fusion protein (F), small hydrophobic protein (SH), hemagglutinin-neuraminidase (HN), and large protein (L) genes, complete cds		0
320	5	0	2020-01-30	0	0	27.8	87	N	2	2	1	1	Y	0	4	0				0
321	5	0	2020-01-30	0	0	27.8	87	N	2	3	1	1	Y	0	4	1	HE647836.1	Eidolon paramyxovirus RC09 partial L gene for RNA dependent RNA polymerase, isolate EPMV_RC09_PP236u2	0.9636	1	JN862571.1	Eidolon helvum paramyxovirus clone U54B polymerase (L) gene, partial cds	0.97
