# Supplementary material for: Longitudinal Secretion of Paramyxovirus RNA in the Urine of Straw-Coloured Fruit Bats (Eidolon helvum)
Source: Preprints.org preprint supplement (doi:10.20944/preprints202107.0467.v1), 2021-07-20
Supplement: Supplementary file 3 [file Supplementary Materials Tables S1 and S2 09.06.2021.docx]

|  | **AZ_RMH_2** | **AZ_RMH_9** | **AZ_RMH_10A** | **AZ_RMH_146** | **AZ_RMH_162A** | **AZ_RMH_317A** | **Alone** | **Total** |
| --- | --- | --- | --- | --- | --- | --- | --- | --- |
| **AZ_PAR_3** | 1 | 1 | 0 | 0 | 0 | 0 | 3 | 5 |
| **AZ_PAR_10B** | 0 | 0 | 2 | 1 | 1 | 0 | 11 | 15 |
| **AZ_PAR_44** | 0 | 0 | 0 | 0 | 0 | 0 | 2 | 2 |
| **AZ_PAR_117** | 3 | 0 | 0 | 0 | 0 | 0 | 0 | 3 |
| **AZ_PAR_162B** | 0 | 0 | 0 | 0 | 1 | 0 | 1 | 2 |
| **AZ_PAR_198** | 0 | 0 | 0 | 0 | 0 | 0 | 2 | 2 |
| **AZ_PAR_292** | 0 | 0 | 0 | 0 | 0 | 0 | 2 | 2 |
| **AZ_PAR_317B** | 0 | 1 | 0 | 0 | 0 | 1 | 1 | 3 |
| **Alone** | 4 | 7* | 20* | 7 | 3 | 0 |  |  |
| **Total** | 8 | 9 | 22 | 8 | 5 | 1 |  |  |

**Table S1.** Paramyxovirus RNA detections and overlap between the two PCRs. Alone = the pool contained paramyxovirus RNA in only this PCR. *In one pool, AZ_RMH_9 and AZ_RMH_10A were detected concurrently in the same (RMH) PCR. PAR = PCR with general paramyxovirus primers, RMH = PCR with *Respirovirus-Morbillivirus-Henipavirus* specific primers.

| **Short name** | **Full name** | **GenBank Accession number** | **Accession number and name of the closest relative in the NCBI database** | **% identity with the closest relative** |
| --- | --- | --- | --- | --- |
| AZ_RMH_2 | BatPV_GH_2019_U2R | MZ393386 | HQ660134.1 Bat Paramyxovirus Eid_hel/GH-M90a/GHA/2009 isolate | 98.86% |
| AZ_RMH_9 | BatPV_GH_2019_U9R | MZ393385 | JN862571.1 Eidolon helvum paramyxovirus clone U54B (L) gene | 97.27% |
| AZ_RMH_10A | BatPV_GH_2019_U10R | MZ393384 | FJ971935.1 Paramyxovirus bat/GH15/2009 (L) gene | 98.40% |
| AZ_RMH_146 | BatPV_GH_2019_U146R | MZ393383 | HQ660147.1 Bat Paramyxovirus Eid_hel/GH-M28/GHA/2009 isolate | 99.77% |
| AZ_RMH_162A | BatPV_GH_2019_U162R | MZ393382 | JN862573.1 Eidolon helvum paramyxovirus clone U51B (L) gene | 99.54% |
| AZ_RMH_317A | BatPV_GH_2019_U317R | MZ393381 | FJ971939.1 Paramyxovirus bat/GH21a/2009 (L) gene | 99.09% |
| AZ_PAR_3 | BatPV_GH_2019_U3P | MZ393377 | JN648061.1 Eidolon helvum paramyxovirus clone U46B (L) gene | 99.25% |
| AZ_PAR_10B | BatPV_GH_2019_U10P | MZ393380 | KF878080.1 Mumps virus strain MuVi/RW154.USA/0.70s[K] | 79.74% |
| AZ_PAR_44 | BatPV_GH_2019_U44P | MZ393379 | JX051320.1 Achimota virus 2 | 99.62% |
| AZ_PAR_117 | BatPV_GH_2019_U117P | MZ393376 | AB853096.1 Bat Paramyxovirus Eid_hel/ZFB09-32/Zambia/2009 L gene | 98.30% |
| AZ_PAR_162B | BatPV_GH_2019_U162P | MZ393375 | JN648082.1 Eidolon helvum paramyxovirus clone U68G (L) gene | 96.80% |
| AZ_PAR_198 | BatPV_GH_2019_U198P | MZ393374 | JX051320.1 Achimota virus 2 | 70.22% |
| AZ_PAR_292 | BatPV_GH_2019_U292P | MZ393378 | JN648056.1 Eidolon helvum paramyxovirus clone U42A (L) gene | 75.33% |
| AZ_PAR_317B | BatPV_GH_2019_U317P | MZ393373 | HE647836.1 Eidolon paramyxovirus RC09 partial L gene | 97.16% |

**Table S2.** Paramyxovirus sequences detected in this study. PAR = PCR with general paramyxovirus primers, RMH = PCR with *Respirovirus-Morbillivirus-Henipavirus* specific primers.
